# Supplementary material for: Exploring the kinetics of ordered silicon nanowires with the formation of nanogaps using metal-assisted chemical etching
Source: Royal Society of Chemistry journal article supplement (doi:10.1039/c4cp04237a), 2014-01-01
Supplement: c4cp04237a1.pdf [file c4cp04237a1.pdf]

## Electronic Supplementary Information

### Exploring the kinetics of Ordered Silicon Nanowires with the Formation of Nanogaps Using Metal-assisted Chemical Etching

Chia-Yun Chen,\* and Yu-Rui Liu

Department of Applied Materials and Optoelectronic Engineering, National Chi Nan University, Nantou 545, Taiwan

#### S1 Observations of existing nanogaps at the edge of Si nanowires

Figures S1 present the side-view SEM images of etched nanowires with various etching durations using a  $\text{H}_2\text{O}_2/\text{HF}$  MaCE method, where one can clearly observe the existence of nanogap surrounding a nanowire. Noticeably, no significant differences of those nanogaps in terms of morphology can be found with the increase of etching time.

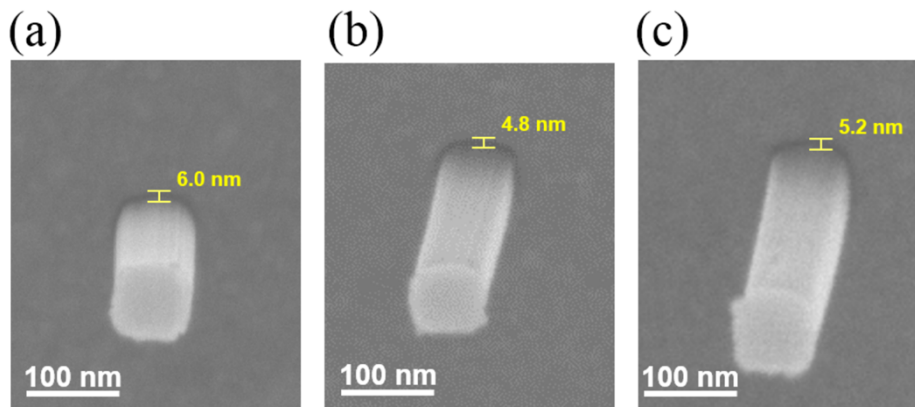

Fig. S1. Side-view SEM image of fabricated Si nanowire arrays via  $\text{H}_2\text{O}_2/\text{HF}$  MaCE method for (a) 1-sec reaction, (b) 3-min reaction, (c) 5-min reaction.

#### S2 Morphology of metal mesh prior to etching process

As described in the main text, 3-nm Ti (as an adhesion layer) and 20-nm Au (as a catalyst for MaCE process) were sequentially deposited on patterned Si. This bilayered structure is substantially thick to serve as a continuous layer for processing the MaCE reaction, as evidenced in Fig. S2.

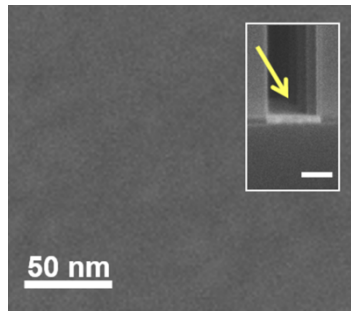

Fig. S2. Top-view SEM image of Ti (3 nm)/Au (20 nm) layers on Si prior to performing MaCE process. The insert figure shows the side-view SEM image of Ti/Au layers after performing 5-min MaCE process. The scale bar is 100 nm.
